# Supplementary material
Source: MDPI journal article supplement (https://www.mdpi.com/2077-0472/6/2/19)
Supplement: s1 [file s1]

**Supplementary Materials**

Logit estimates for utilities of the attribute levels, by country (Details on the parth-worths, which were used to estimate the utilities, can be requested from the lead author).

**Results for the Philippines**

Dimension: Economic Sustainability

Respondent Filter: Equal to 1 (WorkType = AGRI)

Tasks Included: All Random

Percent Certainty = 6.38

Consistent Akaike Info Criterion = 1382.13

Chi Square = 84.14

Relative Chi Square = 4.21

| **Count** | **Effect** | **Std Err** | **t Ratio** | **Attribute Level** |
| --- | --- | --- | --- | --- |
| 1 | −0.12 | 0.11 | −1.08 | Sugar-rich crops |
| 2 | −0.08 | 0.11 | −0.70 | Starch-rich crops |
| 3 | −0.02 | 0.11 | −0.19 | Oil crops |
| 4 | 0.38 | 0.10 | 3.64 | Agriculture/Forest residues |
| 5 | 0.20 | 0.10 | 1.88 | Fast-growing trees |
| 6 | −0.35 | 0.12 | −3.06 | Perennial grasses |
| 7 | −0.11 | 0.11 | −0.98 | Low domestic energy demand |
| 8 | −0.08 | 0.11 | −0.73 | High domestic energy demand |
| 9 | −0.11 | 0.11 | −1.00 | Low domestic energy supply |
| 10 | 0.26 | 0.10 | 2.49 | High domestic energy supply |
| 11 | −0.10 | 0.11 | −0.94 | Low energy import abroad |
| 12 | 0.14 | 0.11 | 1.35 | High energy export abroad |
| 13 | 0.28 | 0.11 | 2.62 | High R&D investment |
| 14 | −0.16 | 0.11 | −1.41 | Low R&D investment |
| 15 | 0.16 | 0.11 | 1.50 | High technology deployment |
| 16 | −0.20 | 0.11 | −1.83 | Low technology deployment |
| 17 | 0.04 | 0.11 | 0.38 | High energy efficiency |
| 18 | −0.11 | 0.11 | −1.03 | Low energy efficiency |
| 19 | 0.36 | 0.10 | 3.43 | High market incentives |
| 20 | −0.41 | 0.12 | −3.50 | Low market incentives |
| 21 | 0.42 | 0.10 | 4.13 | Good market infrastructure |
| 22 | −0.22 | 0.11 | −2.00 | Poor market infrastructure |
| 23 | −0.16 | 0.11 | −1.46 | High trade constraints |
| 24 | 0.02 | 0.11 | 0.19 | Low trade constraints |

Respondent Filter: Equal to 2 (WorkType = NON-AGRI)

Tasks Included: All Random

Percent Certainty = 11.34

Consistent Akaike Info Criterion = 919.04

Chi Square = 99.68

Relative Chi Square = 4.98

| **Count** | **Effect** | **Std Err** | **t Ratio** | **Attribute Level** |
| --- | --- | --- | --- | --- |
| 1 | −0.01 | 0.14 | −0.10 | Sugar-rich crops |
| 2 | −0.06 | 0.14 | −0.42 | Starch-rich crops |
| 3 | −0.16 | 0.14 | −1.12 | Oil crops |
| 4 | 0.48 | 0.13 | 3.65 | Agriculture/Forest residues |
| 5 | 0.16 | 0.14 | 1.19 | Fast-growing trees |
| 6 | −0.41 | 0.15 | −2.78 | Perennial grasses |
| 7 | −0.12 | 0.14 | −0.89 | Low domestic energy demand |
| 8 | 0.14 | 0.14 | 1.05 | High domestic energy demand |
| 9 | −0.02 | 0.14 | −0.12 | Low domestic energy supply |
| 10 | 0.11 | 0.13 | 0.85 | High domestic energy supply |
| 11 | −0.33 | 0.15 | −2.27 | Low energy import abroad |
| 12 | 0.21 | 0.13 | 1.60 | High energy export abroad |
| 13 | 0.10 | 0.14 | 0.73 | High R&D investment |
| 14 | 0.06 | 0.14 | 0.45 | Low R&D investment |
| 15 | −0.00 | 0.14 | −0.03 | High technology deployment |
| 16 | −0.18 | 0.14 | −1.29 | Low technology deployment |
| 17 | 0.28 | 0.14 | 2.00 | High energy efficiency |
| 18 | −0.26 | 0.14 | −1.77 | Low energy efficiency |
| 19 | 0.47 | 0.13 | 3.62 | High market incentives |
| 20 | −0.27 | 0.14 | −1.89 | Low market incentives |
| 21 | 0.82 | 0.13 | 6.52 | Good market infrastructure |
| 22 | −0.64 | 0.15 | −4.17 | Poor market infrastructure |
| 23 | −0.37 | 0.15 | −2.55 | High trade constraints |
| 24 | −0.01 | 0.14 | −0.06 | Low trade constraints |

Dimension: Social Equity

Respondent Filter: Equal to 1 (WorkType = AGRI)

Tasks Included: All Random

Percent Certainty = 15.26

Consistent Akaike Info Criterion = 1265.16

Chi Square = 201.12

Relative Chi Square = 10.06

| **Count** | **Effect** | **Std Err** | **t Ratio** | **Attribute Level** |
| --- | --- | --- | --- | --- |
| 1 | −0.25 | 0.12 | −2.05 | Sugar-rich crops |
| 2 | 0.03 | 0.12 | 0.26 | Starch-rich crops |
| 3 | −0.00 | 0.12 | −0.01 | Oil-rich crops |
| 4 | 0.13 | 0.11 | 1.11 | Agriculture/Forest residues |
| 5 | 0.17 | 0.11 | 1.49 | Fast-growing trees |
| 6 | −0.08 | 0.11 | −0.68 | Perennial grasses |
| 7 | 0.46 | 0.11 | 4.30 | Increase food self-sufficiency |
| 8 | −0.43 | 0.13 | −3.36 | Decrease food self-sufficiency |
| 9 | 0.22 | 0.11 | 1.91 | Increase purchasing power |
| 10 | −0.19 | 0.11 | −1.66 | Decrease purchasing power |
| 11 | 0.37 | 0.11 | 3.41 | Increase affordability of food |
| 12 | −0.43 | 0.13 | −3.38 | Decrease affordability of food |
| 13 | 0.49 | 0.11 | 4.57 | Increase livelihood sources |
| 14 | −0.22 | 0.12 | −1.81 | Decrease livelihood sources |
| 15 | 0.31 | 0.11 | 2.83 | Increase job opportunities |
| 16 | −0.21 | 0.12 | −1.72 | Decrease job opportunities |
| 17 | 0.11 | 0.11 | 0.96 | Improve household lifestyle |
| 18 | −0.49 | 0.13 | −3.80 | Worsen household lifestyle |
| 19 | −0.29 | 0.12 | −2.39 | Hinder equal property rights |
| 20 | 0.65 | 0.10 | 6.29 | Support equal property rights |
| 21 | −0.42 | 0.13 | −3.34 | Cause home displacement |
| 22 | 0.29 | 0.11 | 2.67 | Prevent home displacement |
| 23 | −0.41 | 0.12 | −3.31 | Cause land dispossession |
| 24 | 0.19 | 0.11 | 1.63 | Prevent land dispossession |

Respondent Filter: Equal to 2 (WorkType = NON-AGRI)

Tasks Included: All Random

Percent Certainty = 24.75

Consistent Akaike Info Criterion = 801.20

Chi Square = 217.52

Relative Chi Square = 10.88

| **Count** | **Effect** | **Std Err** | **t Ratio** | **Attribute Level** |
| --- | --- | --- | --- | --- |
| 1 | 0.02 | 0.15 | 0.11 | Sugar-rich crops |
| 2 | −0.19 | 0.16 | −1.18 | Starch-rich crops |
| 3 | 0.32 | 0.15 | 2.07 | Oil-rich crops |
| 4 | 0.01 | 0.15 | 0.06 | Agriculture/Forest residues |
| 5 | 0.00 | 0.16 | 0.01 | Fast-growing trees |
| 6 | −0.16 | 0.15 | −1.01 | Perennial grasses |
| 7 | 0.63 | 0.14 | 4.58 | Increase food self-sufficiency |
| 8 | −0.81 | 0.18 | −4.61 | Decrease food self-sufficiency |
| 9 | 0.40 | 0.14 | 2.76 | Increase purchasing power |
| 10 | −0.44 | 0.15 | −2.89 | Decrease purchasing power |
| 11 | 0.78 | 0.15 | 5.36 | Increase affordability of food |
| 12 | −0.56 | 0.16 | −3.40 | Decrease affordability of food |
| 13 | 0.40 | 0.14 | 2.81 | Increase livelihood sources |
| 14 | −0.24 | 0.15 | −1.56 | Decrease livelihood sources |
| 15 | 0.92 | 0.14 | 6.65 | Increase job opportunities |
| 16 | −0.91 | 0.18 | −5.05 | Decrease job opportunities |
| 17 | 0.33 | 0.15 | 2.30 | Improve household lifestyle |
| 18 | −0.50 | 0.17 | −2.94 | Worsen household lifestyle |
| 19 | −0.14 | 0.16 | −0.89 | Hinder equal property rights |
| 20 | 0.56 | 0.14 | 3.98 | Support equal property rights |
| 21 | −0.34 | 0.16 | −2.18 | Cause home displacement |
| 22 | 0.42 | 0.15 | 2.83 | Prevent home displacement |
| 23 | −0.54 | 0.16 | −3.33 | Cause land dispossession |
| 24 | 0.04 | 0.15 | 0.28 | Prevent land dispossession |

Dimension: Ecological Balance

Respondent Filter: Equal to 1 (WorkType = AGRI)

Tasks Included: All Random

Percent Certainty = 18.30

Consistent Akaike Info Criterion = 1225.06

Chi Square = 241.21

Relative Chi Square = 12.06

| **Count** | **Effect** | **Std Err** | **t Ratio** | **Attribute Level** |
| --- | --- | --- | --- | --- |
| 1 | −0.19 | 0.12 | −1.54 | Sugar-rich crops |
| 2 | −0.18 | 0.12 | −1.48 | Starch-rich crops |
| 3 | 0.14 | 0.11 | 1.26 | Oil-rich crops |
| 4 | 0.14 | 0.11 | 1.24 | Agriculture/Forest residues |
| 5 | 0.40 | 0.12 | 3.43 | Fast-growing trees |
| 6 | −0.32 | 0.12 | −2.58 | Perennial grasses |
| 7 | 0.45 | 0.11 | 4.12 | Very high potential |
| 8 | 0.36 | 0.11 | 3.12 | High potential |
| 9 | 0.15 | 0.11 | 1.35 | Moderate potential |
| 10 | −0.14 | 0.12 | −1.12 | Low potential |
| 11 | −0.14 | 0.12 | −1.20 | Very low potential |
| 12 | −0.68 | 0.13 | −5.11 | No potential |
| 13 | −0.12 | 0.12 | −0.97 | Potential affected by population pressure |
| 14 | 0.16 | 0.12 | 1.36 | Potential not affected by population pressure |
| 15 | −0.36 | 0.13 | −2.80 | Put more pressure on natural resources |
| 16 | 0.30 | 0.11 | 2.70 | Put less pressure on natural resources |
| 17 | 0.45 | 0.12 | 3.92 | Improve landscape and species diversity |
| 18 | −0.44 | 0.12 | −3.51 | Destroy landscape and species diversity |
| 19 | 0.75 | 0.11 | 6.85 | Support nature conservation |
| 20 | −0.69 | 0.14 | −5.02 | Conflict with nature conservation |
| 21 | 0.44 | 0.11 | 3.92 | Compatible with organic farming |
| 22 | −0.34 | 0.12 | −2.73 | Incompatible with organic farming |
| 23 | 0.37 | 0.11 | 3.40 | Available good farming practices |
| 24 | −0.53 | 0.13 | −3.97 | No available good farming practices |

Respondent Filter: Equal to 2 (WorkType = NON-AGRI)

Tasks Included: All Random

Percent Certainty = 20.63

Consistent Akaike Info Criterion = 837.38

Chi Square = 181.34

Relative Chi Square = 9.07

| **Count** | **Effect** | **Std Err** | **t Ratio** | **Attribute Level** |
| --- | --- | --- | --- | --- |
| 1 | −0.06 | 0.15 | −0.38 | Sugar-rich crops |
| 2 | −0.07 | 0.15 | −0.49 | Starch-rich crops |
| 3 | 0.22 | 0.14 | 1.56 | Oil-rich crops |
| 4 | −0.09 | 0.15 | −0.60 | Agriculture/Forest residues |
| 5 | 0.26 | 0.15 | 1.68 | Fast-growing trees |
| 6 | −0.26 | 0.15 | −1.69 | Perennial grasses |
| 7 | 0.46 | 0.14 | 3.29 | Very high potential |
| 8 | 0.76 | 0.14 | 5.40 | High potential |
| 9 | 0.06 | 0.14 | 0.42 | Moderate potential |
| 10 | 0.12 | 0.15 | 0.82 | Low potential |
| 11 | −0.40 | 0.15 | −2.65 | Very low potential |
| 12 | −1.00 | 0.18 | −5.62 | No potential |
| 13 | −0.13 | 0.15 | −0.87 | Potential affected by population pressure |
| 14 | 0.16 | 0.14 | 1.11 | Potential not affected by population pressure |
| 15 | −0.41 | 0.16 | −2.57 | Put more pressure on natural resources |
| 16 | 0.41 | 0.14 | 2.96 | Put less pressure on natural resources |
| 17 | 0.71 | 0.14 | 4.89 | Improve landscape and species diversity |
| 18 | −0.74 | 0.17 | −4.45 | Destroy landscape and species diversity |
| 19 | 0.66 | 0.14 | 4.61 | Support nature conservation |
| 20 | −0.61 | 0.16 | −3.77 | Conflict with nature conservation |
| 21 | 0.64 | 0.14 | 4.70 | Compatible with organic farming |
| 22 | −0.47 | 0.16 | −3.03 | Incompatible with organic farming |
| 23 | 0.50 | 0.14 | 3.69 | Available good farming practices |
| 24 | −0.70 | 0.17 | −4.16 | No available good farming practices |

**Results for India**

Dimension: Economic Sustainability

Respondent Filter: Equal to 1 (WorkType = AGRI)

Tasks Included: All Random

Percent Certainty = 32.25

Consistent Akaike Info Criterion = 673.60

Chi Square = 255.12

Relative Chi Square = 12.76

| **Count** | **Effect** | **Std Err** | **t Ratio** | **Attribute Level** |
| --- | --- | --- | --- | --- |
| 1 | 1.04 | 0.15 | 7.04 | Sugar-rich crops |
| 2 | −0.65 | 0.18 | −3.51 | Starch-rich crops |
| 3 | −0.84 | 0.20 | −4.26 | Oil crops |
| 4 | 0.59 | 0.15 | 3.87 | Agriculture/Forest residues |
| 5 | 1.39 | 0.16 | 8.97 | Fast-growing trees |
| 6 | −1.54 | 0.25 | −6.19 | Perennial grasses |
| 7 | −0.60 | 0.18 | −3.33 | Low domestic energy demand |
| 8 | 0.55 | 0.16 | 3.41 | High domestic energy demand |
| 9 | 0.15 | 0.17 | 0.90 | Low domestic energy supply |
| 10 | −0.48 | 0.17 | −2.77 | High domestic energy supply |
| 11 | −0.02 | 0.17 | −0.10 | Low energy import abroad |
| 12 | 0.40 | 0.16 | 2.45 | High energy export abroad |
| 13 | −0.09 | 0.17 | −0.52 | High R&D investment |
| 14 | −0.02 | 0.17 | −0.12 | Low R&D investment |
| 15 | −0.09 | 0.17 | −0.52 | High technology deployment |
| 16 | 0.31 | 0.16 | 1.90 | Low technology deployment |
| 17 | 0.11 | 0.16 | 0.66 | High energy efficiency |
| 18 | −0.22 | 0.18 | −1.26 | Low energy efficiency |
| 19 | −0.06 | 0.17 | −0.35 | High market incentives |
| 20 | −0.08 | 0.16 | −0.50 | Low market incentives |
| 21 | −0.51 | 0.18 | −2.77 | Good market infrastructure |
| 22 | 0.10 | 0.17 | 0.60 | Poor market infrastructure |
| 23 | 0.08 | 0.17 | 0.46 | High trade constraints |
| 24 | 0.47 | 0.17 | 2.84 | Low trade constraints |

Respondent Filter: Equal to 2 (WorkType = NON-AGRI)

Tasks Included: All Random

Percent Certainty = 22.63

Consistent Akaike Info Criterion = 608.72

Chi Square = 139.20

Relative Chi Square = 6.96

| **Count** | **Effect** | **Std Err** | **t Ratio** | **Attribute Level** |
| --- | --- | --- | --- | --- |
| 1 | 0.46 | 0.16 | 2.81 | Sugar-rich crops |
| 2 | −0.64 | 0.21 | −3.08 | Starch-rich crops |
| 3 | −0.60 | 0.19 | −3.09 | Oil crops |
| 4 | 0.93 | 0.16 | 5.65 | Agriculture/Forest residues |
| 5 | 0.56 | 0.16 | 3.39 | Fast-growing trees |
| 6 | −0.71 | 0.20 | −3.52 | Perennial grasses |
| 7 | −0.66 | 0.21 | −3.22 | Low domestic energy demand |
| 8 | 0.81 | 0.16 | 4.95 | High domestic energy demand |
| 9 | 0.68 | 0.17 | 4.00 | Low domestic energy supply |
| 10 | −0.52 | 0.19 | −2.70 | High domestic energy supply |
| 11 | −0.34 | 0.18 | −1.86 | Low energy import abroad |
| 12 | 0.03 | 0.17 | 0.16 | High energy export abroad |
| 13 | −0.21 | 0.18 | −1.13 | High R&D investment |
| 14 | −0.01 | 0.18 | −0.05 | Low R&D investment |
| 15 | 0.15 | 0.17 | 0.87 | High technology deployment |
| 16 | −0.04 | 0.18 | −0.24 | Low technology deployment |
| 17 | 0.00 | 0.18 | 0.02 | High energy efficiency |
| 18 | 0.10 | 0.18 | 0.56 | Low energy efficiency |
| 19 | −0.26 | 0.18 | −1.41 | High market incentives |
| 20 | 0.12 | 0.18 | 0.68 | Low market incentives |
| 21 | 0.28 | 0.17 | 1.68 | Good market infrastructure |
| 22 | −0.15 | 0.18 | −0.84 | Poor market infrastructure |
| 23 | −0.16 | 0.18 | −0.89 | High trade constraints |
| 24 | 0.16 | 0.18 | 0.92 | Low trade constraints |

Dimension: Social Equity

Respondent Filter: Equal to 1 (WorkType = AGRI)

Tasks Included: All Random

Percent Certainty = 31.40

Consistent Akaike Info Criterion = 680.32

Chi Square = 248.41

Relative Chi Square = 12.42

| **Count** | **Effect** | **Std Err** | **t Ratio** | **Attribute Level** |
| --- | --- | --- | --- | --- |
| 1 | 1.06 | 0.15 | 7.02 | Sugar-rich crops |
| 2 | −0.87 | 0.19 | −4.51 | Starch-rich crops |
| 3 | −0.71 | 0.19 | −3.78 | Oil-rich crops |
| 4 | 0.43 | 0.15 | 2.85 | Agriculture/Forest residues |
| 5 | 1.26 | 0.16 | 7.98 | Fast-growing trees |
| 6 | −1.17 | 0.21 | −5.45 | Perennial grasses |
| 7 | 0.67 | 0.16 | 4.25 | Increase food self-sufficiency |
| 8 | −0.53 | 0.18 | −3.04 | Decrease food self-sufficiency |
| 9 | 0.33 | 0.17 | 1.98 | Increase purchasing power |
| 10 | −0.75 | 0.19 | −4.04 | Decrease purchasing power |
| 11 | 0.50 | 0.16 | 3.13 | Increase affordability of food |
| 12 | −0.21 | 0.17 | −1.19 | Decrease affordability of food |
| 13 | 0.21 | 0.16 | 1.31 | Increase livelihood sources |
| 14 | −0.28 | 0.17 | −1.67 | Decrease livelihood sources |
| 15 | 0.45 | 0.16 | 2.87 | Increase job opportunities |
| 16 | 0.11 | 0.16 | 0.67 | Decrease job opportunities |
| 17 | −0.09 | 0.18 | −0.52 | Improve household lifestyle |
| 18 | −0.40 | 0.18 | −2.24 | Worsen household lifestyle |
| 19 | −0.15 | 0.17 | −0.87 | Hinder equal property rights |
| 20 | 0.05 | 0.16 | 0.35 | Support equal property rights |
| 21 | −0.28 | 0.17 | −1.62 | Cause home displacement |
| 22 | −0.02 | 0.17 | −0.09 | Prevent home displacement |
| 23 | 0.00 | 0.17 | 0.02 | Cause land dispossession |
| 24 | 0.39 | 0.17 | 2.31 | Prevent land dispossession |

Respondent Filter: Equal to 2 (WorkType = NON-AGRI)

Tasks Included: All Random

Percent Certainty = 24.05

Consistent Akaike Info Criterion = 599.94

Chi Square = 147.98

Relative Chi Square = 7.40

| **Count** | **Effect** | **Std Err** | **t Ratio** | **Attribute Level** |
| --- | --- | --- | --- | --- |
| 1 | 0.15 | 0.17 | 0.85 | Sugar-rich crops |
| 2 | −0.71 | 0.20 | −3.53 | Starch-rich crops |
| 3 | −0.47 | 0.19 | −2.52 | Oil-rich crops |
| 4 | 1.08 | 0.18 | 6.18 | Agriculture/Forest residues |
| 5 | 0.80 | 0.16 | 4.84 | Fast-growing trees |
| 6 | −0.85 | 0.21 | −3.99 | Perennial grasses |
| 7 | 0.66 | 0.17 | 3.76 | Increase food self-sufficiency |
| 8 | −0.91 | 0.21 | −4.27 | Decrease food self-sufficiency |
| 9 | 0.79 | 0.17 | 4.66 | Increase purchasing power |
| 10 | −0.47 | 0.19 | −2.42 | Decrease purchasing power |
| 11 | 0.40 | 0.16 | 2.51 | Increase affordability of food |
| 12 | −0.48 | 0.20 | −2.40 | Decrease affordability of food |
| 13 | −0.15 | 0.18 | −0.81 | Increase livelihood sources |
| 14 | 0.12 | 0.17 | 0.69 | Decrease livelihood sources |
| 15 | 0.27 | 0.18 | 1.54 | Increase job opportunities |
| 16 | −0.21 | 0.18 | −1.13 | Decrease job opportunities |
| 17 | 0.09 | 0.18 | 0.53 | Improve household lifestyle |
| 18 | −0.13 | 0.19 | −0.70 | Worsen household lifestyle |
| 19 | 0.04 | 0.18 | 0.22 | Hinder equal property rights |
| 20 | 0.32 | 0.17 | 1.89 | Support equal property rights |
| 21 | −0.20 | 0.18 | −1.08 | Cause home displacement |
| 22 | −0.29 | 0.19 | −1.52 | Prevent home displacement |
| 23 | −0.11 | 0.18 | −0.62 | Cause land dispossession |
| 24 | 0.23 | 0.18 | 1.33 | Prevent land dispossession |

Dimension: Ecological Balance

Respondent Filter: Equal to 1 (WorkType = AGRI)

Tasks Included: All Random

Percent Certainty = 30.52

Consistent Akaike Info Criterion = 687.32

Chi Square = 241.41

Relative Chi Square = 12.07

| **Count** | **Effect** | **Std Err** | **t Ratio** | **Attribute Level** |
| --- | --- | --- | --- | --- |
| 1 | 1.09 | 0.15 | 7.33 | Sugar-rich crops |
| 2 | −0.57 | 0.18 | −3.12 | Starch-rich crops |
| 3 | −0.87 | 0.19 | −4.54 | Oil-rich crops |
| 4 | 0.52 | 0.15 | 3.47 | Agriculture/Forest residues |
| 5 | 1.33 | 0.16 | 8.50 | Fast-growing trees |
| 6 | −1.50 | 0.24 | −6.33 | Perennial grasses |
| 7 | 0.29 | 0.16 | 1.77 | Very high potential |
| 8 | 0.18 | 0.16 | 1.08 | High potential |
| 9 | 0.13 | 0.17 | 0.76 | Moderate potential |
| 10 | 0.06 | 0.16 | 0.37 | Low potential |
| 11 | −0.22 | 0.17 | −1.33 | Very low potential |
| 12 | −0.42 | 0.18 | −2.40 | No potential |
| 13 | −0.21 | 0.17 | −1.24 | Potential affected by population pressure |
| 14 | 0.13 | 0.16 | 0.83 | Potential not affected by population pressure |
| 15 | 0.08 | 0.16 | 0.51 | Put more pressure on natural resources |
| 16 | 0.43 | 0.16 | 2.75 | Put less pressure on natural resources |
| 17 | 0.20 | 0.16 | 1.25 | Improve landscape and species diversity |
| 18 | −0.64 | 0.18 | −3.45 | Destroy landscape and species diversity |
| 19 | 0.32 | 0.16 | 2.05 | Support nature conservation |
| 20 | −0.53 | 0.17 | −3.16 | Conflict with nature conservation |
| 21 | 0.10 | 0.17 | 0.60 | Compatible with organic farming |
| 22 | −0.23 | 0.17 | −1.36 | Incompatible with organic farming |
| 23 | 0.48 | 0.16 | 3.06 | Available good farming practices |
| 24 | −0.14 | 0.18 | −0.82 | No available good farming practices |

Respondent Filter: Equal to 2 (WorkType = NON-AGRI)

Tasks Included: All Random

Percent Certainty = 26.54

Consistent Akaike Info Criterion = 584.63

Chi Square = 163.29

Relative Chi Square = 8.16

| **Count** | **Effect** | **Std Err** | **t Ratio** | **Attribute Level** |
| --- | --- | --- | --- | --- |
| 1 | 0.43 | 0.17 | 2.58 | Sugar-rich crops |
| 2 | −0.95 | 0.23 | −4.13 | Starch-rich crops |
| 3 | −0.49 | 0.20 | −2.49 | Oil-rich crops |
| 4 | 1.30 | 0.17 | 7.71 | Agriculture/Forest residues |
| 5 | 0.88 | 0.17 | 5.25 | Fast-growing trees |
| 6 | −1.17 | 0.24 | −4.81 | Perennial grasses |
| 7 | 0.43 | 0.18 | 2.44 | Very high potential |
| 8 | −0.16 | 0.19 | −0.86 | High potential |
| 9 | 0.47 | 0.18 | 2.59 | Moderate potential |
| 10 | −0.03 | 0.18 | −0.15 | Low potential |
| 11 | −0.35 | 0.19 | −1.88 | Very low potential |
| 12 | −0.36 | 0.19 | −1.88 | No potential |
| 13 | −0.36 | 0.20 | −1.86 | Potential affected by population pressure |
| 14 | 0.08 | 0.18 | 0.41 | Potential not affected by population pressure |
| 15 | −0.18 | 0.19 | −0.94 | Put more pressure on natural resources |
| 16 | 0.27 | 0.18 | 1.51 | Put less pressure on natural resources |
| 17 | −0.04 | 0.18 | −0.22 | Improve landscape and species diversity |
| 18 | 0.24 | 0.18 | 1.32 | Destroy landscape and species diversity |
| 19 | 0.24 | 0.18 | 1.38 | Support nature conservation |
| 20 | −0.40 | 0.19 | −2.06 | Conflict with nature conservation |
| 21 | 0.58 | 0.18 | 3.27 | Compatible with organic farming |
| 22 | −0.67 | 0.20 | −3.32 | Incompatible with organic farming |
| 23 | 0.42 | 0.17 | 2.47 | Available good farming practices |
| 24 | −0.17 | 0.18 | −0.92 | No available good farming practices |

**Results for China**

Dimension: Economic Sustainability

Respondent Filter: Equal to 1 (WorkType = AGRI)

Tasks Included: All Random

Percent Certainty = 4.87

Consistent Akaike Info Criterion = 561.50

Chi Square = 22.27

Relative Chi Square = 1.11

| **Count** | **Effect** | **Std Err** | **t Ratio** | **Attribute Level** |
| --- | --- | --- | --- | --- |
| 1 | −0.21 | 0.19 | −1.11 | Sugar-rich crops |
| 2 | −0.11 | 0.18 | −0.58 | Starch-rich crops |
| 3 | 0.01 | 0.18 | 0.07 | Oil crops |
| 4 | 0.27 | 0.17 | 1.57 | Agriculture/Forest residues |
| 5 | 0.08 | 0.18 | 0.43 | Fast-growing trees |
| 6 | −0.04 | 0.18 | −0.23 | Perennial grasses |
| 7 | 0.02 | 0.18 | 0.10 | Low domestic energy demand |
| 8 | −0.18 | 0.19 | −0.95 | High domestic energy demand |
| 9 | −0.51 | 0.20 | −2.51 | Low domestic energy supply |
| 10 | 0.24 | 0.17 | 1.35 | High domestic energy supply |
| 11 | 0.14 | 0.18 | 0.76 | Low energy import abroad |
| 12 | 0.30 | 0.17 | 1.71 | High energy export abroad |
| 13 | 0.28 | 0.18 | 1.57 | High R&D investment |
| 14 | −0.12 | 0.19 | −0.65 | Low R&D investment |
| 15 | 0.28 | 0.17 | 1.61 | High technology deployment |
| 16 | −0.26 | 0.19 | −1.36 | Low technology deployment |
| 17 | −0.15 | 0.19 | −0.80 | High energy efficiency |
| 18 | −0.03 | 0.19 | −0.16 | Low energy efficiency |
| 19 | 0.27 | 0.18 | 1.54 | High market incentives |
| 20 | 0.05 | 0.18 | 0.30 | Low market incentives |
| 21 | −0.05 | 0.18 | −0.28 | Good market infrastructure |
| 22 | −0.03 | 0.18 | −0.18 | Poor market infrastructure |
| 23 | −0.31 | 0.19 | −1.59 | High trade constraints |
| 24 | 0.06 | 0.18 | 0.35 | Low trade constraints |

Respondent Filter: Equal to 2 (WorkType = NON-AGRI)

Tasks Included: All Random

Percent Certainty = 5.51

Consistent Akaike Info Criterion = 1106.18

Chi Square = 56.13

Relative Chi Square = 2.81

| **Count** | **Effect** | **Std Err** | **t Ratio** | **Attribute Level** |
| --- | --- | --- | --- | --- |
| 1 | −0.10 | 0.13 | −0.80 | Sugar-rich crops |
| 2 | −0.06 | 0.12 | −0.45 | Starch-rich crops |
| 3 | −0.15 | 0.13 | −1.22 | Oil crops |
| 4 | 0.37 | 0.12 | 3.18 | Agriculture/Forest residues |
| 5 | 0.21 | 0.12 | 1.75 | Fast-growing trees |
| 6 | −0.26 | 0.13 | −2.03 | Perennial grasses |
| 7 | −0.03 | 0.12 | −0.26 | Low domestic energy demand |
| 8 | 0.20 | 0.12 | 1.71 | High domestic energy demand |
| 9 | −0.22 | 0.13 | −1.72 | Low domestic energy supply |
| 10 | 0.17 | 0.12 | 1.43 | High domestic energy supply |
| 11 | 0.03 | 0.12 | 0.26 | Low energy import abroad |
| 12 | −0.15 | 0.13 | −1.20 | High energy export abroad |
| 13 | −0.05 | 0.12 | −0.43 | High R&D investment |
| 14 | 0.10 | 0.12 | 0.81 | Low R&D investment |
| 15 | 0.09 | 0.12 | 0.72 | High technology deployment |
| 16 | 0.02 | 0.12 | 0.20 | Low technology deployment |
| 17 | 0.02 | 0.13 | 0.13 | High energy efficiency |
| 18 | −0.17 | 0.13 | −1.35 | Low energy efficiency |
| 19 | 0.45 | 0.11 | 3.92 | High market incentives |
| 20 | −0.23 | 0.13 | −1.80 | Low market incentives |
| 21 | 0.16 | 0.12 | 1.40 | Good market infrastructure |
| 22 | −0.23 | 0.13 | −1.83 | Poor market infrastructure |
| 23 | −0.32 | 0.13 | −2.43 | High trade constraints |
| 24 | 0.17 | 0.12 | 1.40 | Low trade constraints |

Dimension: Social Equity

Respondent Filter: Equal to 1 (WorkType = AGRI)

Tasks Included: All Random

Percent Certainty = 7.43

Consistent Akaike Info Criterion = 549.83

Chi Square = 33.94

Relative Chi Square = 1.70

| **Count** | **Effect** | **Std Err** | **t Ratio** | **Attribute Level** |
| --- | --- | --- | --- | --- |
| 1 | 0.06 | 0.18 | 0.30 | Sugar-rich crops |
| 2 | −0.04 | 0.18 | −0.24 | Starch-rich crops |
| 3 | −0.22 | 0.20 | −1.11 | Oil-rich crops |
| 4 | 0.27 | 0.18 | 1.50 | Agriculture/Forest residues |
| 5 | −0.09 | 0.19 | −0.50 | Fast-growing trees |
| 6 | 0.03 | 0.18 | 0.18 | Perennial grasses |
| 7 | 0.12 | 0.18 | 0.65 | Increase food self-sufficiency |
| 8 | 0.04 | 0.18 | 0.23 | Decrease food self-sufficiency |
| 9 | −0.13 | 0.19 | −0.68 | Increase purchasing power |
| 10 | 0.06 | 0.18 | 0.35 | Decrease purchasing power |
| 11 | 0.12 | 0.18 | 0.68 | Increase affordability of food |
| 12 | −0.22 | 0.20 | −1.11 | Decrease affordability of food |
| 13 | 0.36 | 0.18 | 2.06 | Increase livelihood sources |
| 14 | −0.15 | 0.19 | −0.80 | Decrease livelihood sources |
| 15 | 0.25 | 0.17 | 1.41 | Increase job opportunities |
| 16 | −0.21 | 0.19 | −1.09 | Decrease job opportunities |
| 17 | 0.14 | 0.18 | 0.76 | Improve household lifestyle |
| 18 | −0.38 | 0.20 | −1.88 | Worsen household lifestyle |
| 19 | 0.25 | 0.18 | 1.39 | Hinder equal property rights |
| 20 | 0.18 | 0.18 | 1.00 | Support equal property rights |
| 21 | −0.66 | 0.22 | −3.05 | Cause home displacement |
| 22 | 0.18 | 0.18 | 1.00 | Prevent home displacement |
| 23 | −0.26 | 0.19 | −1.37 | Cause land dispossession |
| 24 | 0.32 | 0.18 | 1.84 | Prevent land dispossession |

Respondent Filter: Equal to 2 (WorkType = NON-AGRI)

Tasks Included: All Random

Percent Certainty = 7.18

Consistent Akaike Info Criterion = 1089.09

Chi Square = 73.22

Relative Chi Square = 3.66

| **Count** | **Effect** | **Std Err** | **t Ratio** | **Attribute Level** |
| --- | --- | --- | --- | --- |
| 1 | −0.15 | 0.13 | −1.20 | Sugar-rich crops |
| 2 | 0.06 | 0.12 | 0.48 | Starch-rich crops |
| 3 | −0.28 | 0.13 | −2.11 | Oil-rich crops |
| 4 | 0.29 | 0.12 | 2.43 | Agriculture/Forest residues |
| 5 | 0.21 | 0.12 | 1.74 | Fast-growing trees |
| 6 | −0.13 | 0.13 | −1.02 | Perennial grasses |
| 7 | 0.21 | 0.12 | 1.80 | Increase food self-sufficiency |
| 8 | −0.14 | 0.13 | −1.08 | Decrease food self-sufficiency |
| 9 | −0.09 | 0.13 | −0.73 | Increase purchasing power |
| 10 | 0.02 | 0.12 | 0.20 | Decrease purchasing power |
| 11 | 0.11 | 0.12 | 0.92 | Increase affordability of food |
| 12 | −0.12 | 0.13 | −0.93 | Decrease affordability of food |
| 13 | 0.13 | 0.12 | 1.13 | Increase livelihood sources |
| 14 | −0.34 | 0.13 | −2.54 | Decrease livelihood sources |
| 15 | 0.37 | 0.12 | 3.15 | Increase job opportunities |
| 16 | −0.14 | 0.13 | −1.08 | Decrease job opportunities |
| 17 | 0.27 | 0.12 | 2.29 | Improve household lifestyle |
| 18 | −0.30 | 0.13 | −2.25 | Worsen household lifestyle |
| 19 | −0.20 | 0.13 | −1.59 | Hinder equal property rights |
| 20 | 0.31 | 0.12 | 2.71 | Support equal property rights |
| 21 | −0.27 | 0.13 | −2.09 | Cause home displacement |
| 22 | 0.23 | 0.12 | 1.91 | Prevent home displacement |
| 23 | −0.38 | 0.13 | −2.89 | Cause land dispossession |
| 24 | 0.31 | 0.12 | 2.54 | Prevent land dispossession |

Dimension: Ecological Balance

Respondent Filter: Equal to 1 (WorkType = AGRI)

Tasks Included: All Random

Percent Certainty = 6.61

Consistent Akaike Info Criterion = 555.61

Chi Square = 28.16

Relative Chi Square = 1.41

| **Count** | **Effect** | **Std Err** | **t Ratio** | **Attribute Level** |
| --- | --- | --- | --- | --- |
| 1 | 0.09 | 0.18 | 0.50 | Sugar-rich crops |
| 2 | 0.01 | 0.18 | 0.05 | Starch-rich crops |
| 3 | −0.20 | 0.19 | −1.05 | Oil-rich crops |
| 4 | 0.26 | 0.18 | 1.48 | Agriculture/Forest residues |
| 5 | 0.22 | 0.18 | 1.22 | Fast-growing trees |
| 6 | −0.38 | 0.20 | −1.92 | Perennial grasses |
| 7 | 0.15 | 0.18 | 0.83 | Very high potential |
| 8 | 0.02 | 0.18 | 0.12 | High potential |
| 9 | 0.27 | 0.18 | 1.52 | Moderate potential |
| 10 | −0.47 | 0.20 | −2.31 | Low potential |
| 11 | 0.13 | 0.18 | 0.72 | Very low potential |
| 12 | −0.10 | 0.19 | −0.55 | No potential |
| 13 | −0.00 | 0.18 | −0.01 | Potential affected by population pressure |
| 14 | −0.13 | 0.19 | −0.69 | Potential not affected by population pressure |
| 15 | 0.17 | 0.18 | 0.99 | Put more pressure on natural resources |
| 16 | −0.06 | 0.19 | −0.33 | Put less pressure on natural resources |
| 17 | −0.03 | 0.19 | −0.14 | Improve landscape and species diversity |
| 18 | 0.05 | 0.19 | 0.24 | Destroy landscape and species diversity |
| 19 | 0.30 | 0.17 | 1.74 | Support nature conservation |
| 20 | −0.55 | 0.21 | −2.66 | Conflict with nature conservation |
| 21 | −0.11 | 0.19 | −0.61 | Compatible with organic farming |
| 22 | −0.07 | 0.19 | −0.37 | Incompatible with organic farming |
| 23 | 0.19 | 0.18 | 1.08 | Available good farming practices |
| 24 | 0.24 | 0.18 | 1.36 | No available good farming practices |

Respondent Filter: Equal to 2 (WorkType = NON-AGRI)

Tasks Included: All Random

Percent Certainty = 8.57

Consistent Akaike Info Criterion = 1074.92

Chi Square = 87.39

Relative Chi Square = 4.37

| **Count** | **Effect** | **Std Err** | **t Ratio** | **Attribute Level** |
| --- | --- | --- | --- | --- |
| 1 | −0.23 | 0.13 | −1.73 | Sugar-rich crops |
| 2 | −0.00 | 0.13 | −0.03 | Starch-rich crops |
| 3 | −0.20 | 0.13 | −1.50 | Oil-rich crops |
| 4 | 0.21 | 0.12 | 1.79 | Agriculture/Forest residues |
| 5 | 0.28 | 0.12 | 2.34 | Fast-growing trees |
| 6 | −0.06 | 0.13 | −0.51 | Perennial grasses |
| 7 | −0.01 | 0.12 | −0.09 | Very high potential |
| 8 | 0.02 | 0.13 | 0.15 | High potential |
| 9 | 0.09 | 0.12 | 0.71 | Moderate potential |
| 10 | 0.12 | 0.12 | 0.96 | Low potential |
| 11 | −0.03 | 0.12 | −0.27 | Very low potential |
| 12 | −0.18 | 0.13 | −1.40 | No potential |
| 13 | 0.07 | 0.12 | 0.59 | Potential affected by population pressure |
| 14 | −0.03 | 0.13 | −0.25 | Potential not affected by population pressure |
| 15 | −0.01 | 0.12 | −0.09 | Put more pressure on natural resources |
| 16 | 0.28 | 0.12 | 2.38 | Put less pressure on natural resources |
| 17 | 0.17 | 0.12 | 1.36 | Improve landscape and species diversity |
| 18 | −0.48 | 0.14 | −3.43 | Destroy landscape and species diversity |
| 19 | 0.58 | 0.12 | 4.96 | Support nature conservation |
| 20 | −0.51 | 0.14 | −3.61 | Conflict with nature conservation |
| 21 | 0.30 | 0.12 | 2.55 | Compatible with organic farming |
| 22 | −0.45 | 0.14 | −3.30 | Incompatible with organic farming |
| 23 | 0.21 | 0.12 | 1.75 | Available good farming practices |
| 24 | −0.12 | 0.13 | −0.98 | No available good farming practices |
